# Supplementary material for: Prediction and Optimization of Stretch-Flangeability of Advanced High Strength Steels through Microstructure-Property Correlations Utilizing Machine Learning Approaches
Source: Research Square preprint supplement (doi:10.21203/rs.3.rs-5516696/v1), 2025-03-12
Supplement: Supplementary file 1 [file d90e5ec65eab54e48e17a840.xlsx]

## Sheet: Table S1
	Table S1. 212 collected datasets, including mechanical properties (hole expansion (HER), ultimate tensile strength (UTS), yield strength (YS), total elongation (TE), uniform elongation (UE), and post uniform elongation (PUE)) and microstructural characteristics (volume fractions of ferrite (VF), bainite (VB), martensite (VM) and tempered martensite (VTM)), with missing values from earlier literat…
	Steel Condition	Reference	HER	UTS	YS	TE	UE	PUE	VF	VB	VM	VTM
			(%)	(MPa)	(MPa)	(%)	(%)	(%)	(%)	(%)	(%)	(%)
	1	33	17	1092.8	530.3	20.8	12.3	8.5	21.7	29.5	48.8	0
	2		14.6	1039.1	542.3	17.9	12.6	5.3	28.2	29	42.8	0
	3		14.5	1181.4	604.1	19.1	11	8.1	19.1	16.6	64.2	0
	4		11.5	1099.8	574.9	16.2	11.1	5.1	19.5	19.8	60.8	0
	5		17.6	1086	512.5	19.5	11.5	8	27.5	21.7	50.7	0
	6		17.3	1059	528.3	14.9	11	3.9	35.5	14.1	50.4	0
	7		17	1168.2	596	17.8	10.2	7.6	25.3	12.9	61.8	0
	8		13.2	1096.9	576	16.6	10.9	5.7	36	15.8	48.2	0
	9		19	1061.4	494.2	22	13.4	8.6	41.8	7.9	50.3	0
	10		17.6	1005.9	463.3	25.3	14.8	10.5	44.3	9.4	46.3	0
	11		27.5	974.7	518.2	22.2	11.9	10.3	30.3	7.5	19	43.2
	12		24.3	936.5	545.4	19.6	11.1	8.5	30.3	11.1	25.6	30.1
	13		22.9	1046	583.6	19	10.1	8.9	25.7	8.9	23.8	41.6
	14		22.1	972.7	542.1	19.2	10.9	8.3	30.1	10.4	25.3	34.1
	15		26.6	973.7	502	22.3	11.8	10.5	31	12.7	27.5	28.9
	16		22	950.5	494.6	19	12.1	6.9	35.5	9.2	26.1	29.2
	17		23.2	1040.7	570.7	17.6	10.1	7.5	26.2	8.4	27.5	37.9
	18		23.5	975.9	522.6	20	12.1	7.9	33.4	16.8	25.9	27.5
	19		21.2	983.9	459.9	24.2	14.2	10	32.9	10.2	48.2	8.6
	20		17.6	961.6	444.3	25	15.3	9.7	39.4	5.7	43.4	11.5
	21	34	51.4	894	551.5	22			67.5	0	5.5	27
	22		36.4	909.4	470.6	19.1			69	0	14	17
	23		31.6	907.4	460.1	17.6			70.5	21	8.5	0
	24		28.6	968.7	506.1	14.6			75	0	25	0
	25		47.8	903.9	564	19.2			61	0	7	32
	26		41.5	942.1	493.9	18.9			72.7	0	21	6.3
	27		33.8	945.3	506.1	18.8			71	5	24	0
	28		28.5	979.9	517.2	15.6			70	0	30	0
	29		50.7	919.2	582.2	22.4			63.5	0	7.5	29
	30		41.1	946.7	499.8	17.9
	31		32	960.1	522.4	23.1			70	16	14	0
	32		25.9	944.8	477.3	17.1			71.5	0	28.5	0
	33		51.4	967.2	578.2	17.7			61	0	6	33
	34		40	974.6	519.9	20.6			68.7	0	23	8.3
	35		27.4	979.1	527.1	16.8			70.5	1.5	28	0
	36		30.8	1018.7	515.1	19.4			68.5	0	31.5	0
	37		44.7	852.8	538.3	23.1			64	0	7	29
	38		38	861.5	508.6	22.2			62.3	0	13	24.7
	39		32.4	899.4	504	24			64	22	14	0
	40		14.3	889	539.5	4.4			67	14	19	0
	41		41.5	921.4	629.6	20.3			57	0	4.5	38.5
	42		33.2	927.6	560.1	17.7			66.4	0	14.3	19.3
	43		24.8	933.5	544.7	19.7			72	14	14	0
	44		26.5	969.1	566.1	19.5			70	8	22	0
	45		46.4	861.8	531	22.5			64.5	0	5	30.5
	46		33.9	870.3	474	23			70.3	0	12	17.7
	47		36.5	898.3	461.6	27.5			73	9	18	0
	48		36.8	906.6	482	13			70	9	21	0
	49		46.8	904.9	561.7	27.7			58	0	5.5	36.5
	50		40.2	912.6	471.1	21.3			65.5	0	21.5	13
	51		33.1	933.6	534.3	18.3			75	6	19	0
	52		32.6	957.5	511.8	20.9			65	3	32	0
	53		44.9	713.9	353.7	27.5					10	8
	54		48.2	716.4	356.8	25.8			87	3	10	0
	55		52.4	726.3	360.5	29.4			82.3	8.7	9	0
	56		43.7	727.6	338	25.5			82.5	6.5	11	0
	57		30.6	779.4	393	28					11	7
	58		30.8	785.2	392.3	22.1			85	2	13	0
	59		40.1	773.4	394.6	23			82.5	6.5	11	0
	60		28.2	761.8	372.2	21.9			80	0.5	19.5	0
	61		44.9	754.1	361.4	29.4					14	2
	62		51.9	729.3	357.4	27.3			83	6	11	0
	63		47.8	745.1	370.6	27.8			86	4.5	9.5	0
	64		37.3	739.1	355.6	19.2			80	8	12	0
	65		53.9	795.8	381.3	28.4					13	4
	66		25.2	792.8	368.4	22.8			79.5	2.5	18	0
	67		31.1	776.1	370.1	26.7			82.5	5	12.5	0
	68		26.2	817.7	384.1	21.1			77.7	2.3	20	0
	69		57.6	695.8	354.3	32.9					7	12
	70		43.3	699.6	340.2	28.4			82	8	10	0
	71		45.3	683.1	328.7	30.4			80	12	8	0
	72		39.6	697.9	335	28.8			76	14	10	0
	73		47.4	769.2	436.9	26.7					8	9
	74		40.5	763.1	411.5	24.1			77	6	17	0
	75		44.3	766.7	409.5	25			81	9.7	9.3	0
	76		33.2	787.5	403	27.1			75.5	11.5	13	0
	77		50.7	701.2	350.8	36.1					8	7
	78		48	705	339.7	29.7			82	8	10	0
	79		38.3	702.9	338.1	33			77	12	11	0
	80		49.7	716.4	341.5	31.5			80	8	12	0
	81		30.1	760.4	391.5	31.5					14	4.5
	82		44.5	774.2	364.5	27.2			83	8	9	0
	83		27.7	773.1	382.7	29.4			79	8	13	0
	84		28.6	789.8	358.8	25			74	8	18	0
	85	35	87	1065	735	13.7	7.8	5.9
	86		65	1216	843	11.5	6.5	5
	87	36	29.3	1081	627	11.7	7.8	3.9
	88		30.2	1052	651	11.7	7.7	4
	89		31.8	1029	725	11	6.9	4.1
	90		38.4	984	780	11.1	6.4	4.7
	91		43.2	954	809	10.1	5.6	4.5
	92		31.8	1083	884	9.8	5.6	4.2
	93		37.2	1090	979	6.1	2.3	3.8
	94		39.4	1083	1003	3.9	1.3	2.6
	95		39.3	1080	1007	3.6	1.2	2.4
	96	37	95	1043	716	13.8
	97		62	1256	827	9.9
	98	38	63	729	688	22.5			78	0	22	0
	99	39	18.5	981.2	683.4	16
	100	40	130	710	391	20.7					34.5
	101		105	668	353	17					34.7
	102		55	613	318	28.6					33.9
	103	41	19	1029	664	12.5	8.3	4.2
	104		23	1024	724	15.6	10.6	5
	105		78	1024	944	6.9	4.1	2.8
	106		50	1003	826	10.9	7.3	3.6
	107	42	25	805	677	28	19	9
	108		51	773	598	31.3	22.8	8.5
	109	43	26.1	1022	694	24	9.2	14.8	49.6	0	50.4	0
	110		24.9	843	478	34.6	13.4	21.2	62	0	38	0
	111		27.1	1087	727	30.3	8.6	21.7	38.9	0	61.1	0
	112		43.5	1249	1008	26.3	5	21.3	23.8	0	76.2	0
	113	44	42.2	652	392	26.8
	114		46.3	618	391	26.4
	115		46.9	630	415	25.7
	116		33.9	876	511	16.9
	117		24.4	1038	760	12.4
	118		19.6	1013	718	11.1
	119	45	30	1021	694	24	9.2	14.8
	120		27.9	884	500	29.7	13.5	16.2
	121	18	38.5	1012	691	16.8	10.2	6.6	55	0	45	0
	122		50.9	987	703	13.7	8.6	5.1	61	0	39	0
	123		49	965	655	15.5	9.8	5.7	62	0	38	0
	124		14.5	1005	633	15.4	10	5.4	63	0	37	0
	125		25.6	1175	846	11	6.9	4.1	50	0	50	0
	126	46	66	1193	841	12.5	7.1	5.4
	127		190	810	710	19.6	7	12.6
	128	47	74	746	657	19	10	9	18	82	0	0
	129		37	815	533	23	12	11	85	0	15	0
	130		117	534	416	34	17	17	48	52	0	0
	131	48	153	617	369.8	26.5
	132		51	809	524.3	23.9
	133		176	610	551.3	22.9
	134		180	815	737.5	19.9
	135	49	25.2	1000	689	15	8.2	6.8	67.5	0	32.5	0
	136		18.4	1024	682	15.1	8.2	6.9	70	0	30	0
	137		14.9	1084	769	12.4	5.9	6.5	69	0	31	0
	138		17.2	984	727	12.5	6.8	5.7	72	0	28	0
	139		16.8	1020	665	16.8	8.9	7.9	65	0	35	0
	140		23.3	1007	663	17.3	8.8	8.5	64	0	36	0
	141		13.5	993	665	17.1	9.7	7.4	69	0	31	0
	142		14.3	983	558	19.7	13.5	6.2	73.7	0	26.3	0
	143	50	29.9	1145.6	846	20.1	7	13
	144		27.8	877.4	598.7	21.8	11.4	10.4
	145	51	26.7	767	341	26	17.8	8.2	75	0	25	0
	146		30.8	773	335	26.3	18.4	7.9	71	0	29	0
	147		31.5	754	313	26.8	18.8	8	73	0	27	0
	148		25	827	368	21.1	15.1	6	74	0	26	0
	149		34.6	837	363	24.2	16.7	7.5	69	0	31	0
	150		42.9	781	345	24.5	17.2	7.3	68	0	32	0
	151		21.7	872	402	18.5	13.6	4.9	69	0	31	0
	152		23.3	888	401	18.3	13.7	4.6	61	0	39	0
	153		26.7	841	374	22.4	16.2	6.2	60	0	40	0
	154		23.3	833	390	20	14	6	70	0	30	0
	155		24.6	853	383	18.3	14.2	4.1	65	0	35	0
	156		28.8	809	356	23.5	15.4	8.1	66	0	34	0
	157		15	992	535	15.3	10.8	4.5	68	0	32	0
	158		20	984	521	15.3	10.5	4.8	60	0	40	0
	159		22.6	877	414	16.2	12.1	4.1	60	0	40	0
	160	52	59	998	886	11			0	25.9	0	74.1
	161		52	1001	897	11			0	22.8	0	77.2
	162		40	985	871	11			0	18.8	0	81.2
	163	53	16	1064.8		18.9			72.3	0	27.8	0
	164		5.4	1227.2		14.2			59.6	0	40.4	0
	165		0.7	1517.4		7.5			34.3	0	65.7	0
	166		15.6	1253.3		14.8			42.6	0	57.4	0
	167		22.2	1340.7		10.7			27.9	0	72.1	0
	168		12.1	1227.9		14.8			46.7	0	53.4	0
	169		25.3	1272.5		13.5			27.9	0	72.1	0
	170		23.7	1372.1		12.2			26.1	0	73.9	0
	171		24.9	1597.4		11.5			9.5	0	90.5	0
	172	54	42.7	735	513	19	11	8	60	0	40	0
	173		76.1	622	412	24	13	11	58	15	27	0
	174		78.5	623	412	24	13	11	47	23	30	0
	175		83.3	648	422	23	13	10	44	28	28	0
	176	55	33.9	1017	638	19			66	0	34	0
	177		57.9	1028	783	15			51	0	49	0
	178	56	70.4	602.3	501.6	32.6
	179		31.1	608.5	430.7	33.6
	180	57	35	1027	738	10.3
	181		85	1008	920	8.8
	182	16	56	528	310	27.5	18.9	8.6
	183		57.2	555	332	26.7	17.4	9.3
	184		38	624	379	23.5	16	7.5
	185		51	636	376	23.8	15.7	8.1
	186		29.3	671	397	23.1	16.2	6.9
	187		36.6	676	433	21.3	13.9	7.4
	188		33	583	337	30.6	18.5	12.1
	189		29.8	675	434	21.3	13.8	7.5
	190	58	105	611	412	24.1	15.3	8.8
	191	59	17.2	664.9	424.8	16.7
	192		19.8	639.6	375.5	21.3
	193	60	34.3	840	500	18
	194	61	11.2	970	544	14.2	9.9	4.3
	195		34.9	799	523	17	9.5	7.5
	196	62	48.2	618	401	26.4
	197		42	876	511	16.9
	198		33.7	1038	760	12.4
	199		29.1	1013	718	11.1
	200	63	90	785	698	7.7	3.6	4.1
	201		92	781	712	8	4.7	3.3
	202		92	845	755	8	4.3	3.7
	203		81	864	801	8.5	4.7	3.8
	204		91	840	765	7.5	3.9	3.6
	205		80	890	831	8	5	3
	206		85	823	743	8.2	4.1	4.1
	207		85	865	808	8.5	4.7	3.8
	208	64	37	811	657	16
	209		38	838	749	18
	210		53	922	825	7
	211		58	847	795	13
	212		72	842	686	17
